# Supplementary material for: Surface engineering in PbS via partial oxidation: towards an advanced electrocatalyst for reduction of levulinic acid to γ-valerolactone
Source: Chem Sci. 2018 Dec 3;10(6):1754–9. doi: 10.1039/c8sc03161d (PMC6368243; doi:10.1039/c8sc03161d)
Supplement: Supplementary file 1 [file SC-010-C8SC03161D-s001.pdf]

**Supporting information:**

**Surface engineering in PbS *via* partial oxidation: Towards an advanced electrocatalyst for reduction of levulinic acid to  $\gamma$ -valerolactone**

Haoran Wu,<sup>a,b</sup> Jinliang Song,<sup>\*a</sup> Chao Xie,<sup>a,b</sup> Yue Hu,<sup>a,b</sup> Pei Zhang,<sup>a</sup> Guanying Yang,<sup>a</sup> and Buxing Han<sup>\*a,b</sup>

<sup>a</sup>Beijing National Laboratory for Molecular Science, CAS Key Laboratory of Colloid and Interface and Thermodynamics, CAS Research/Education Center for Excellence in Molecular Sciences, Institute of Chemistry, Chinese Academy of Sciences, Beijing 100190, China.

<sup>b</sup>School of Chemistry and Chemical Engineering, University of Chinese Academy of Sciences, Beijing 100049, China.

E-mails: songjl@iccas.ac.cn, hanbx@iccas.ac.cn

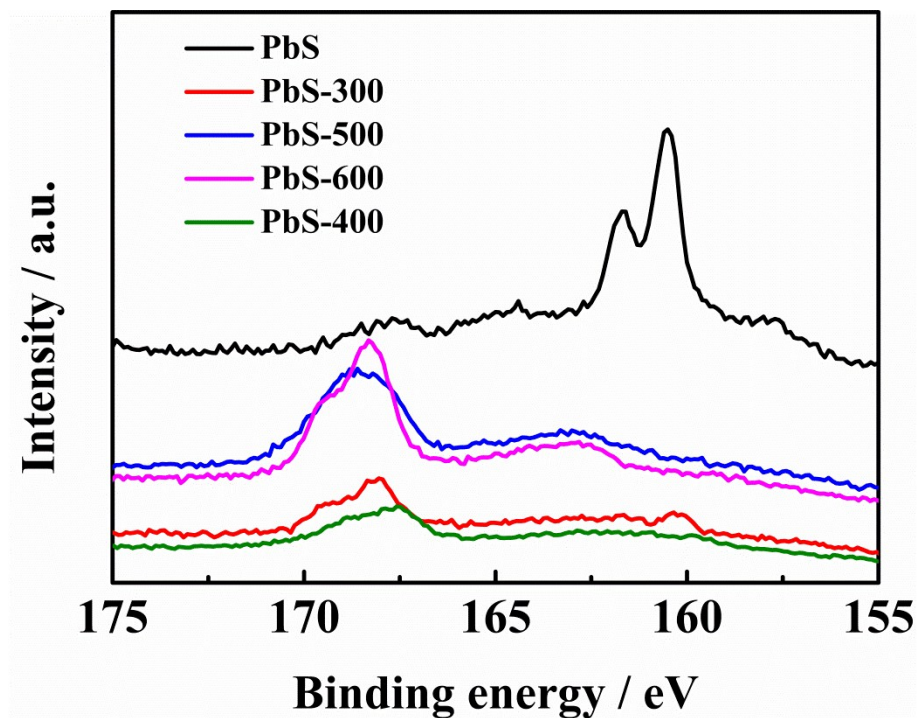

**Fig. S1.** XPS spectrum of S 2p in different PbS-X materials.

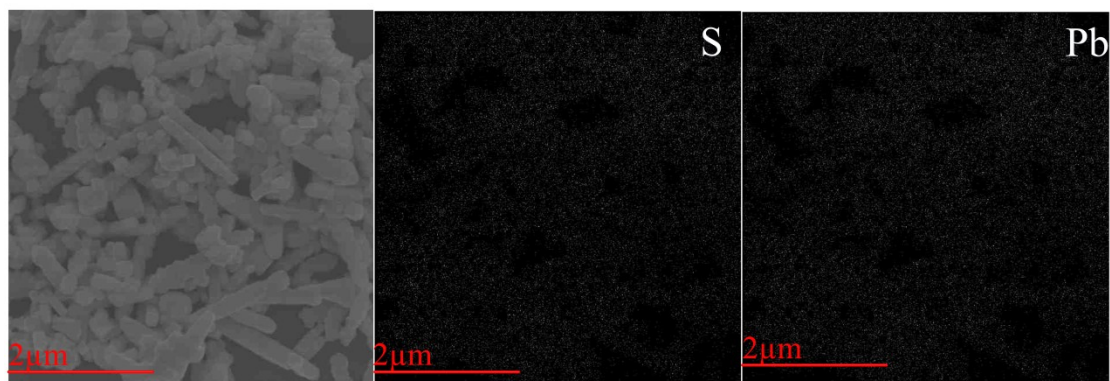

**Fig. S2.** Elements mapping of PbS.

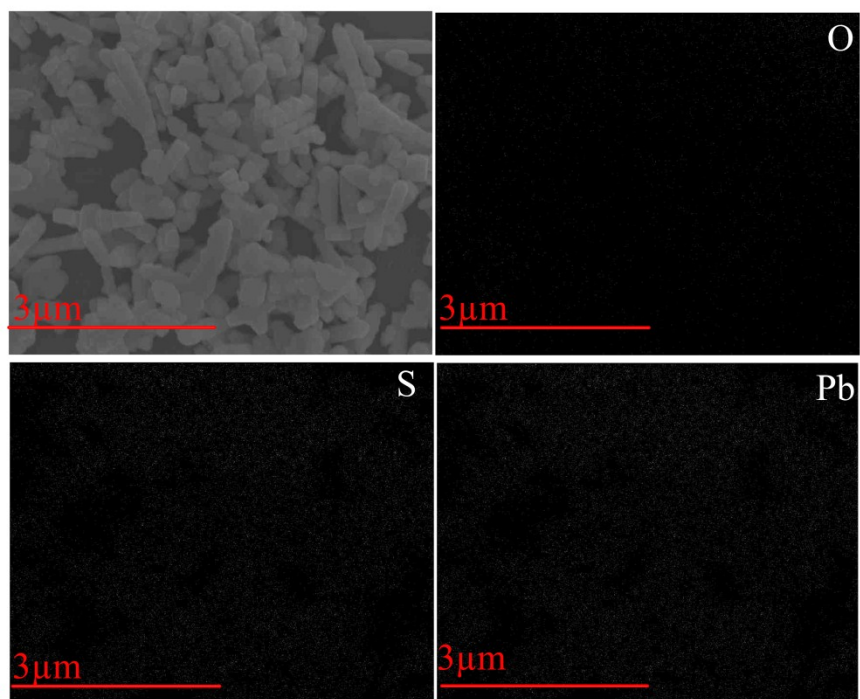

**Fig. S3.** Elements mapping of PbS-300.

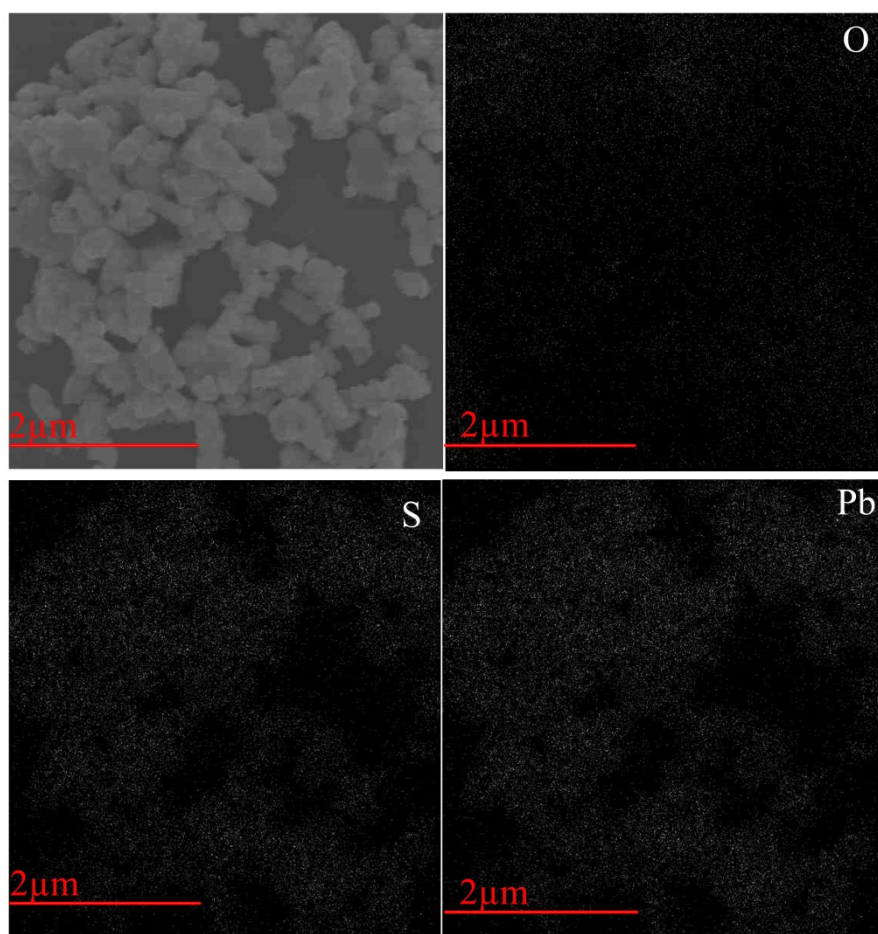

**Fig. S4.** Elements mapping of PbS-400.

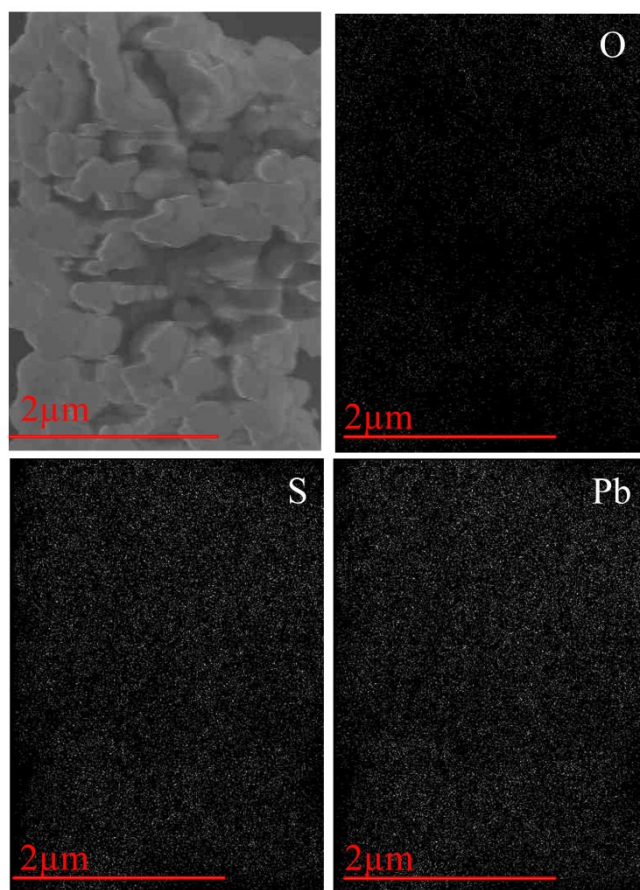

**Fig. S5.** Elements mapping of PbS-500.

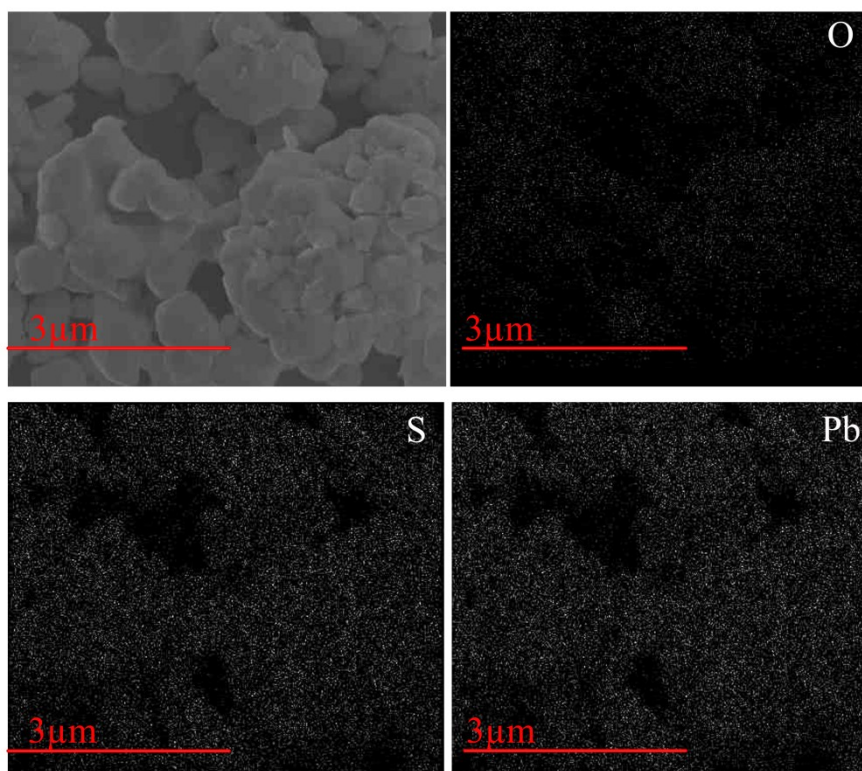

**Fig. S6.** Elements mapping of PbS-600.

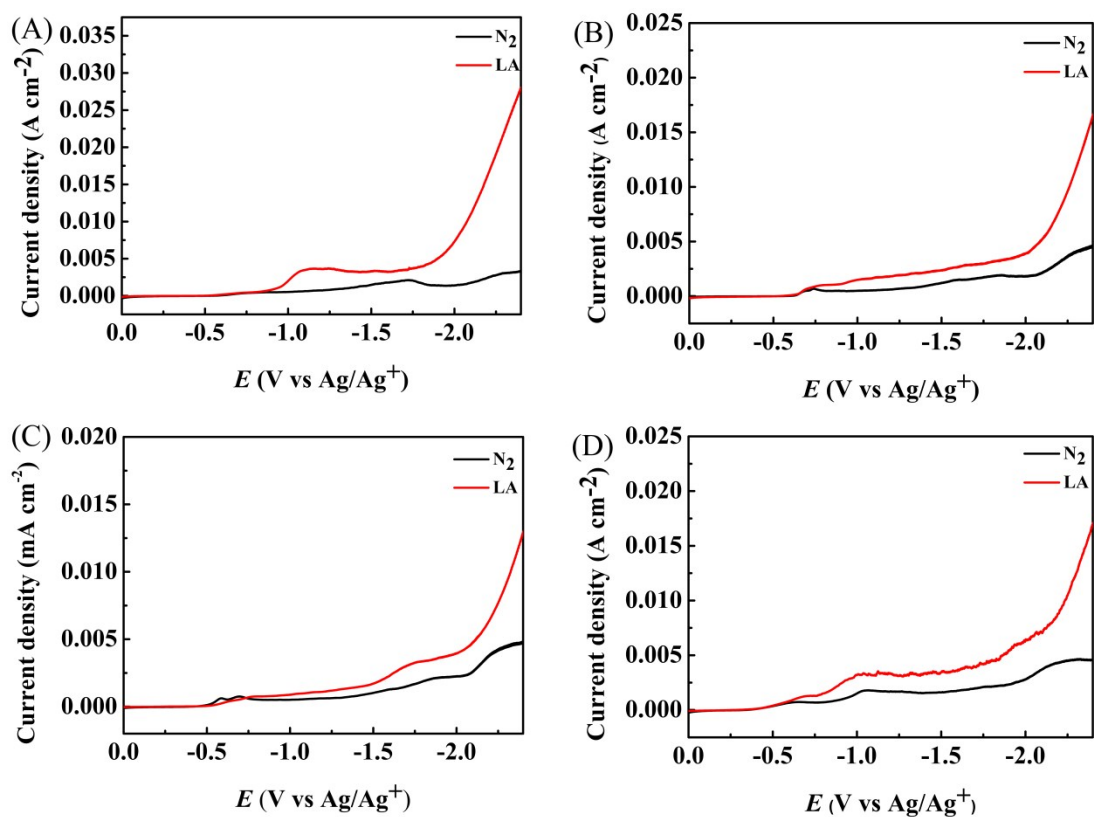

**Fig. S7.** LSV measurements using PbS-X/CP electrode for the electrochemical reduction of LA in the electrolyte of IL (1.8 wt%)-MeCN- $\text{H}_2\text{O}$  (1.8 wt%) at room temperature. (A) PbS/CP, (B) PbS-300/CP, (C) PbS-500/CP, and (D) PbS-600/CP.

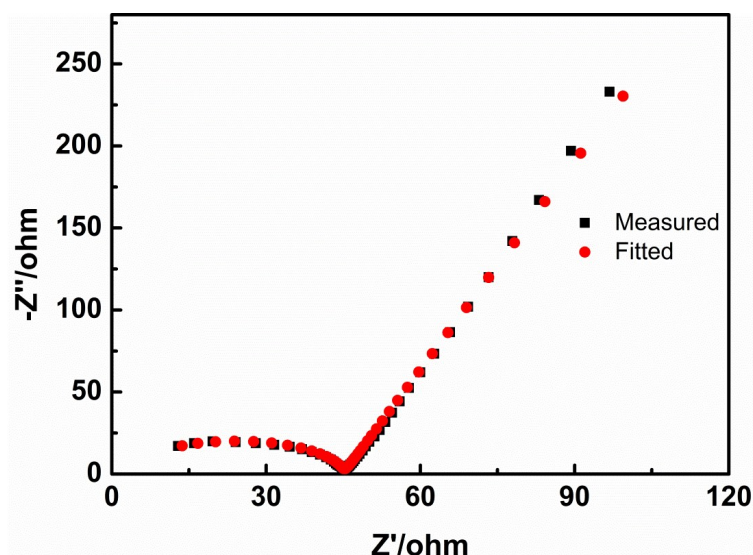

**Fig. S8.** The measured and fitted EIS spectra of PbS/CP in  $[\text{Bmim}]\text{BF}_4$  (1.8 wt%)-MeCN- $\text{H}_2\text{O}$  (1.8 wt%) electrolyte in the presence of LA.

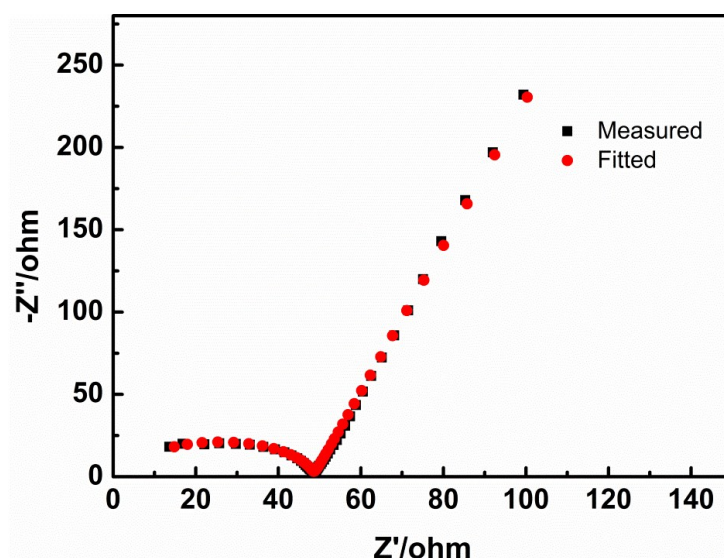

**Fig. S9.** The measured and fitted EIS spectra of PbS-300/CP in [Bmim]BF<sub>4</sub> (1.8 wt%)-MeCN-H<sub>2</sub>O (1.8 wt%) electrolyte in the presence of LA.

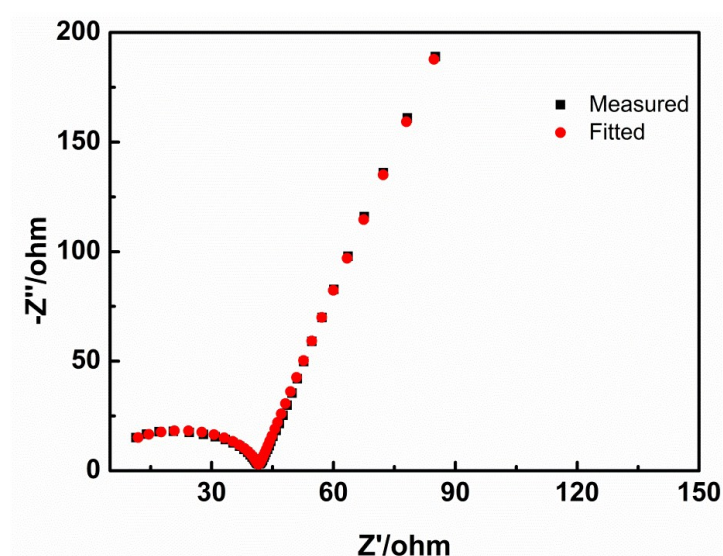

**Fig. S10.** The measured and fitted EIS spectra of PbS-400/CP in [Bmim]BF<sub>4</sub> (1.8 wt%)-MeCN-H<sub>2</sub>O (1.8 wt%) electrolyte in the presence of LA.

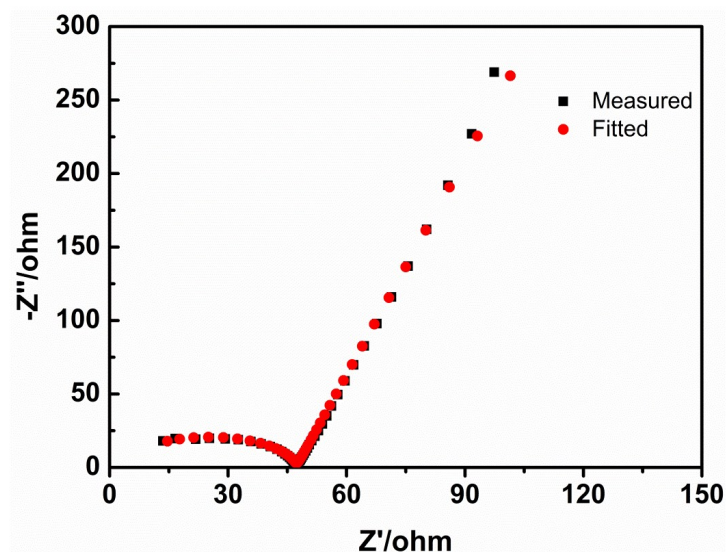

**Fig. S11.** The measured and fitted EIS spectra of PbS-500/CP in [Bmim]BF<sub>4</sub> (1.8 wt%)-MeCN-H<sub>2</sub>O (1.8 wt%) electrolyte in the presence of LA.

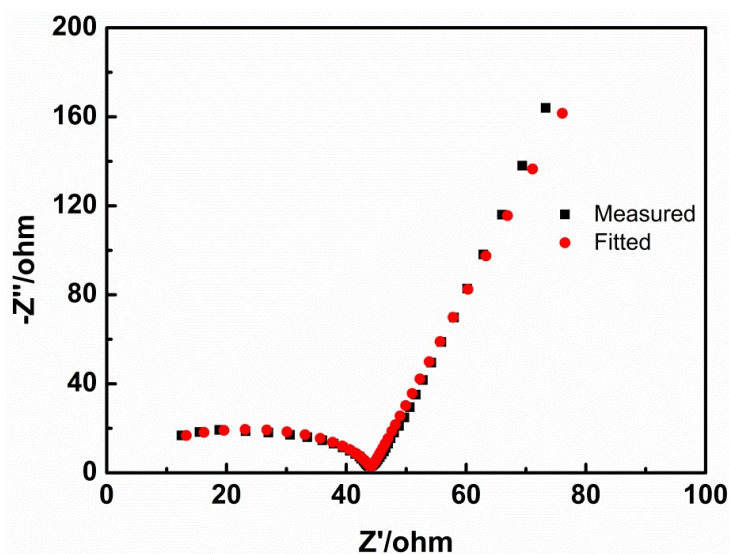

**Fig. S12.** The measured and fitted EIS spectra of PbS-600/CP in [Bmim]BF<sub>4</sub> (1.8 wt%)-MeCN-H<sub>2</sub>O (1.8 wt%) electrolyte in the presence of LA.

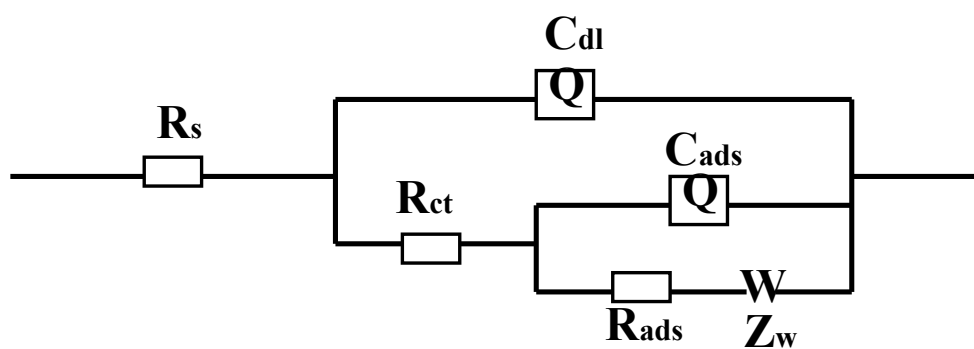

**Fig. S13.** Electrical equivalent circuit for fitting the measured impedance data.  $R_s$ ,  $C_{dl}$ ,  $R_{ct}$ ,  $C_{ads}$ ,  $R_{ads}$ , and  $Z_w$  represent solution resistance, double layer capacitance, electron transfer resistance, surface adsorption capacitance, surface adsorption resistance and Warburg impedance, respectively.

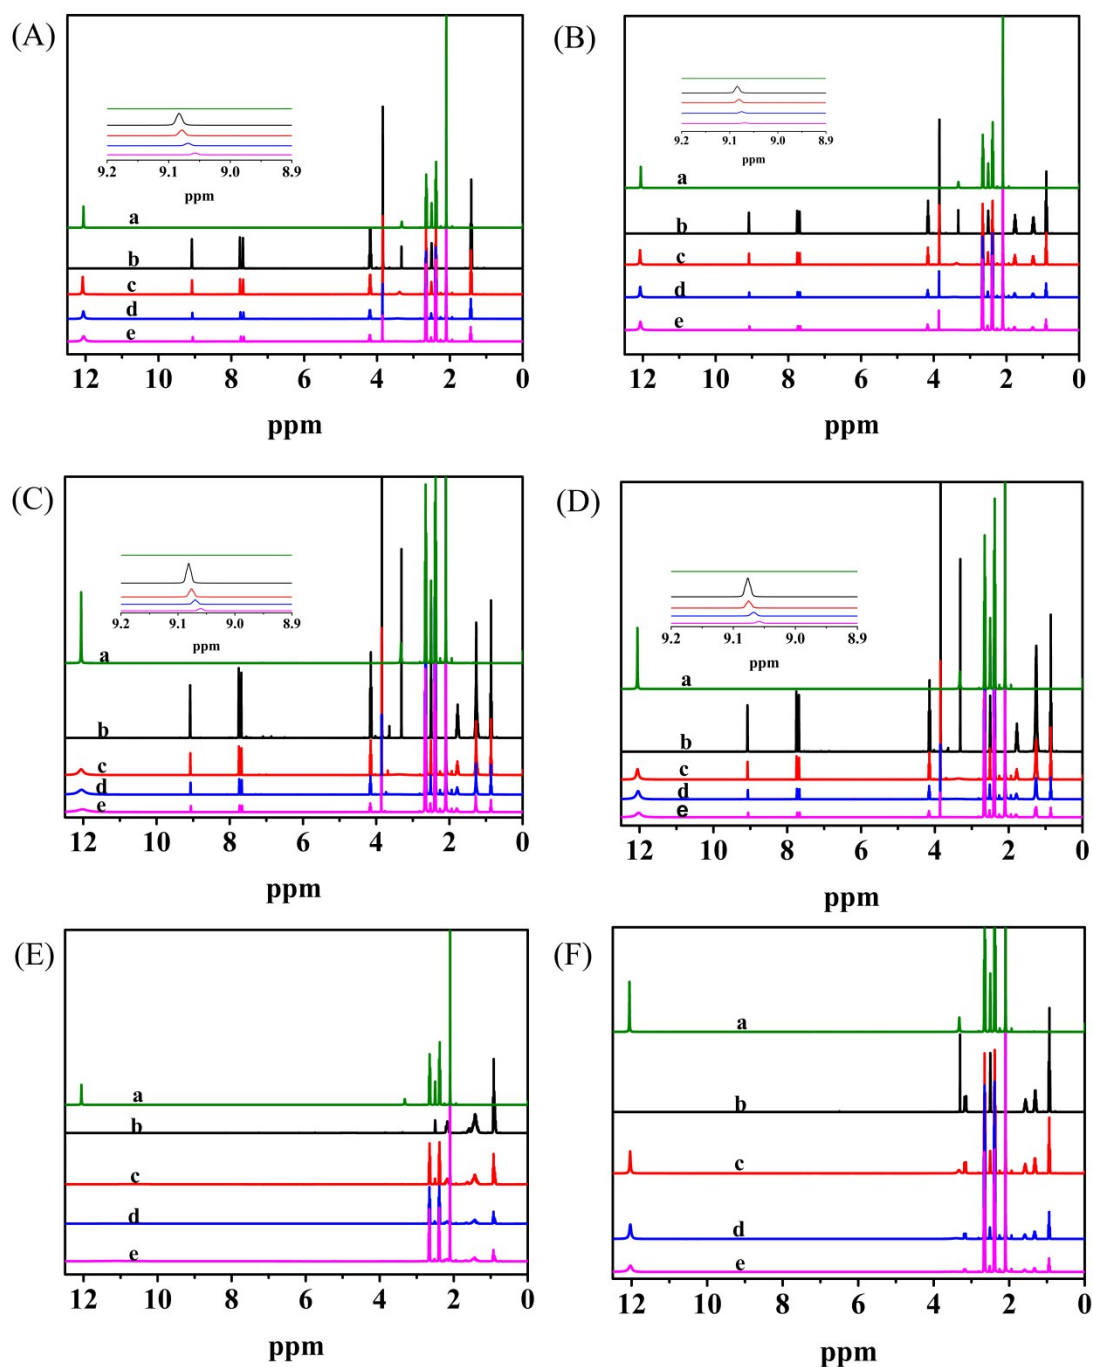

**Fig. S14.**  $^1\text{H}$  NMR spectra of LA and different ILs. [Emim] $\text{BF}_4$  (A), [Bmim] $\text{BF}_4$  (B), [Hmim] $\text{BF}_4$  (C), [Omim] $\text{BF}_4$  (D), [TBP] $\text{BF}_4$  (E), and [TBA] $\text{BF}_4$  (F). (a and b represented LA and IL respectively. c, d, and e represented the mixture of IL and LA. The amount of IL was 12 mg and the amount of LA was 30  $\mu\text{L}$ , 70  $\mu\text{L}$ , and 110  $\mu\text{L}$  in c, d and e, respectively. DMSO- $\text{d}_6$  was used as solvent.)

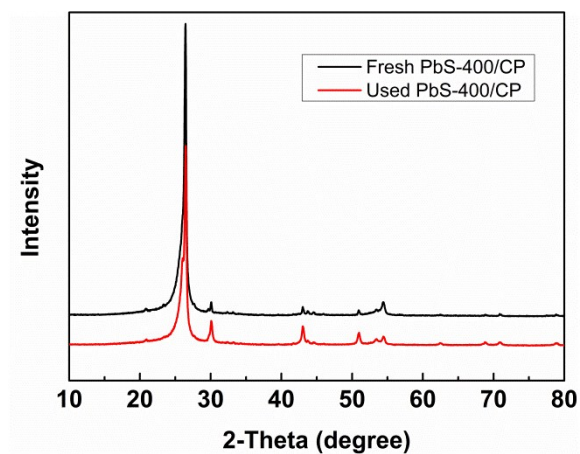

**Fig. S15.** XRD patterns of the fresh and used PbS-400/CP electrode

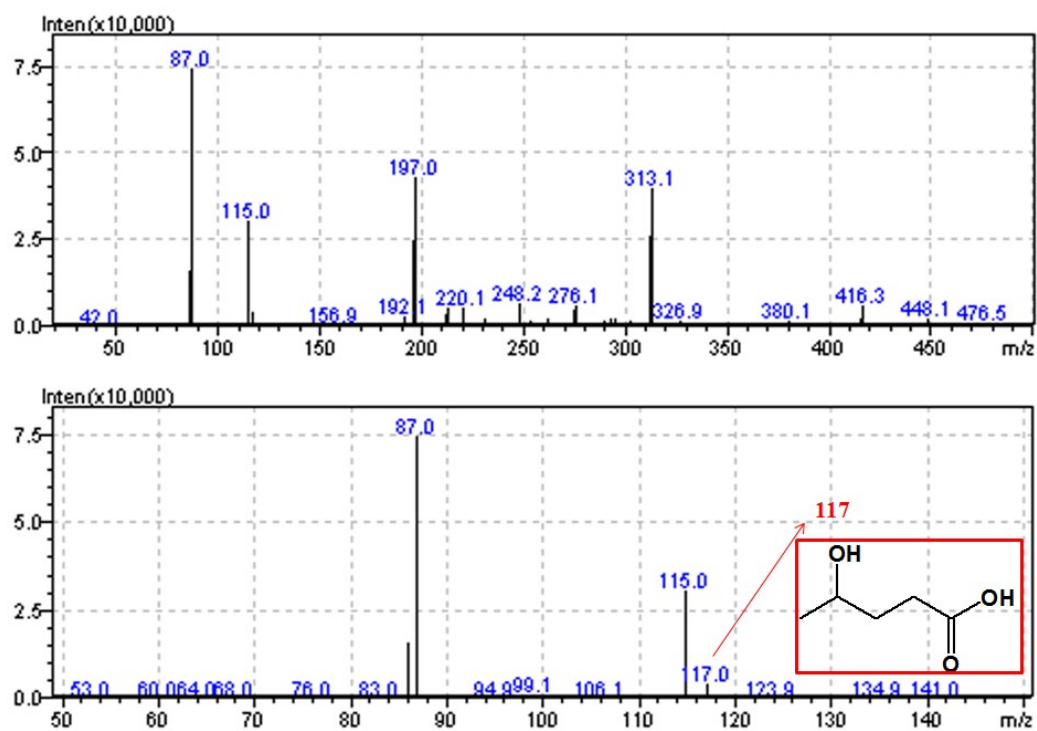

**Fig. S16.** MS spectra of the electrolyte after electrolysis for the electrochemical reduction of LA using PbS-400/CP in [Bmim]BF<sub>4</sub> (1.8 wt%)-MeCN-H<sub>2</sub>O (1.8 wt%) at -2.15 V vs. Ag/Ag<sup>+</sup> for 4 h.

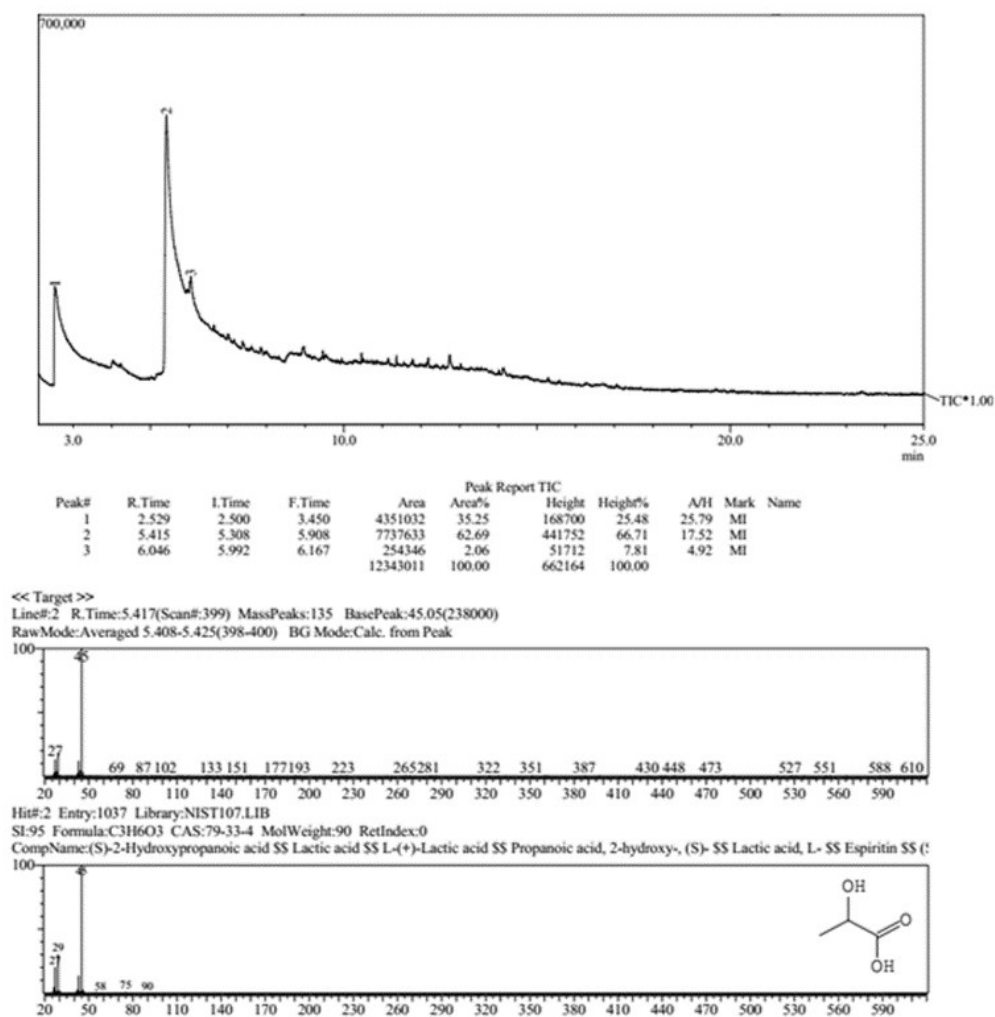

**Fig. S17.** GC-MS spectra of the electrolyte after electrolysis of pyruvic acid using PbS-400/CP in the electrolyte of [Bmim]BF<sub>4</sub> (1.8 wt%)-MeCN-H<sub>2</sub>O (1.8 wt%) at -2.15 V vs. Ag/Ag<sup>+</sup> for 4 h.

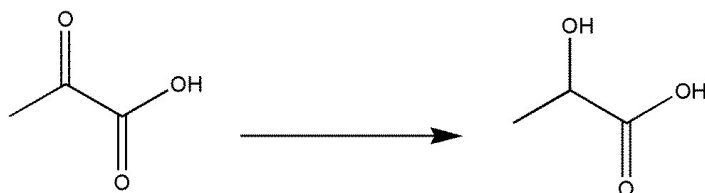

**Scheme S1.** Electrochemical reduction of pyruvic acid over PbS-400/CP electrode in the electrolyte of [Bmim]BF<sub>4</sub> (1.8 wt %)-MeCN-H<sub>2</sub>O (1.8%).

**Table S1.** The chemical composition of the PbS-X.

| Materials | The determined elements content from ICP-AES |         | Composition                               |
|-----------|----------------------------------------------|---------|-------------------------------------------|
|           | Pb (wt%)                                     | S (wt%) |                                           |
| PbS       | 86.54                                        | 12.69   | PbS                                       |
| PbS-300   | 85.81                                        | 13.04   | (PbS) <sub>28.06</sub> /PbSO <sub>4</sub> |
| PbS-400   | 80.38                                        | 11.80   | (PbS) <sub>2.45</sub> /PbSO <sub>4</sub>  |
| PbS-500   | 70.42                                        | 10.26   | (PbS) <sub>0.16</sub> /PbSO <sub>4</sub>  |
| PbS-600   | 68.25                                        | 9.79    | PbSO <sub>4</sub>                         |

The theoretical contents of Pb in PbS and PbSO<sub>4</sub> are 86.6 wt% and 68.3 wt%, respectively. The theoretical contents of S in PbS and PbSO<sub>4</sub> are 13.4 wt% and 10.57 wt%, respectively.
